# Supplementary material
Source: PubMed Central journal article supplement (PMC8666700)
Supplement: archdischild-2020-320388supp001.pdf [file archdischild-2020-320388supp001.pdf]

**SUPPLEMENTARY APPENDIX****S.1: Full demographic details of cohort**

|                                 | <b>Number<br/>(n=70)</b> | <b>Percentage</b> |
|---------------------------------|--------------------------|-------------------|
| <b>Age</b>                      | 3 months<br>– 16 years   | n/a               |
| <b>Gender</b>                   |                          |                   |
| Female                          | 21                       | 30%               |
| Male                            | 49                       | 70%               |
| <b>Socioeconomic status</b>     |                          |                   |
| Quintile 1 [most deprived]      | 15                       | 21.4%             |
| Quintile 2                      | 24                       | 34.3%             |
| Quintile 3                      | 18                       | 25.7%             |
| Quintile 4                      | 8                        | 11.4%             |
| Quintile 5 [least deprived]     | 5                        | 7.1%              |
| <b>Case definition</b>          |                          |                   |
| Met RCPCH case definition       | 57                       | 81.4%             |
| Met CDC case definition         | 44                       | 62.9%             |
| Met WHO case definition         | 38                       | 54.3%             |
| MDT-diagnosed atypical PIMS-TS  | 13                       | 18.6%             |
| <b>Severity</b>                 |                          |                   |
| Length of stay                  | 2-22 days                |                   |
| Required ventilator             | 10                       | 14.3%             |
| Required inotropes              | 32                       | 45.7%             |
| Death                           | 1                        | 1%                |
| <b>Ethnicity [whole cohort]</b> |                          |                   |

|                                              |           |              |
|----------------------------------------------|-----------|--------------|
| <b>White</b>                                 | <b>18</b> | <b>25.7%</b> |
| White - British                              | 11        |              |
| White - Irish                                | 0         |              |
| White - Any other White background           | 7         |              |
| <b>Mixed</b>                                 | <b>4</b>  | <b>5.7%</b>  |
| Mixed - White and Black Caribbean            | 0         |              |
| Mixed - White and Black African              | 1         |              |
| Mixed - White and Asian                      | 2         |              |
| Mixed - Any other Mixed Background           | 1         |              |
| <b>Asian/Asian British</b>                   | <b>7</b>  | <b>10.0%</b> |
| Asian - Indian                               | 3         |              |
| Asian - Pakistani                            | 1         |              |
| Asian - Bangladeshi                          | 1         |              |
| Chinese                                      | 0         |              |
| Asian - Any other Asian background           | 2         |              |
| <b>Black/African/Caribbean/Black British</b> | <b>38</b> | <b>54.3%</b> |
| Black - Caribbean                            | 2         |              |
| Black - African                              | 27        |              |
| Black - Any other Black background           | 9         |              |
| <b>Other - Any other ethnic group</b>        | <b>3</b>  | <b>4.3%</b>  |
| Other - Any other ethnic group               | 3         |              |
| <hr/>                                        |           |              |
| <b>Body Mass Index</b>                       |           |              |
| >25                                          | 11        | 15.7%        |

<25 59 84.3%

**Appendix S.2: Inflammatory characteristics of patients who met (group A) and did not meet (group B) the RCPCH PIMS- TS case definition**

|                                              | PIMSTS meeting RCPCH criteria | MDT diagnosis PIMS-TS not meeting criteria |
|----------------------------------------------|-------------------------------|--------------------------------------------|
| Total number of patients                     | 57                            | 13                                         |
| Mean peak ferritin (range) (ug/L)*           | 955 (109-4909)                | 926 (77- 4220)                             |
| Mean peak CRP (range) (mg/L)**               | 202 (48-425)                  | 197 (48-556)                               |
| Peak coronary Z score >2.0 (total number)    | 36.8% (21)                    | 38.4% (5)                                  |
| Proportion of Black ethnicity (total number) | 52.6% (30)                    | 61.5% (8)                                  |
| Proportion of White ethnicity (total number) | 26.3% (15)                    | 23.1% (3)                                  |
| Proportion of Asian ethnicity (total number) | 12.3% (7)                     | -                                          |
| Proportion of Mixed ethnicity (total number) | 5.3% (3)                      | 7.7 % (1)                                  |
| Proportion of Other ethnicity (total number) | 3.5% (2)                      | 7.7 % (1)                                  |
| Most commonly represented IMD group          | 2                             | 2                                          |

\*Normal ferritin value <0.05 ug/L

\*\*Normal CRP value <5ml/L

**Appendix S.3 Full regression models of outcome variables**

Length of hospital stay (log transformed)

|              | Complete model |             |         | Model excluding ethnicity |        |         |
|--------------|----------------|-------------|---------|---------------------------|--------|---------|
|              | Estimate       | 95% CI      | p-value | Estimate                  | 95% CI | p-value |
| Asian        | 0.944          | 0.643, 1.39 | 0.765   |                           |        |         |
| Black        | 1.38           | 1.04, 1.82  | 0.0252  |                           |        |         |
| Mixed        | 0.706          | 0.442, 1.13 | 0.142   |                           |        |         |
| Other        | 1.46           | 0.853, 2.5  | 0.164   |                           |        |         |
| IMD quintile | 0.913          | 0.827, 1.01 | 0.0727  | 0.854                     | 0.777, | 0.00141 |

|                       |       |             |         |       |             |        |
|-----------------------|-------|-------------|---------|-------|-------------|--------|
|                       |       |             |         |       | 0.939       |        |
|                       |       | 0.939,      |         |       |             |        |
| BMI                   | 0.964 | 0.989       | 0.00588 | 0.975 | 0.95, 1     | 0.0592 |
| Age (months)          | 1     | 1, 1        | 0.0368  | 1     | 1, 1        | 0.0625 |
| Gender (male)         | 1.05  | 0.833, 1.33 | 0.656   | 1.04  | 0.812, 1.33 | 0.747  |
| Likelihood Ratio Test |       |             | 0.01118 |       |             |        |

---

 PICU admission
 

---

|                       | Complete model |             |         | Model excluding ethnicity |             |         |
|-----------------------|----------------|-------------|---------|---------------------------|-------------|---------|
|                       | Estimate       | 95% CI      | p-value | Estimate                  | 95% CI      | p-value |
| Asian                 | 0.953          | 0.148, 6.5  | 0.959   |                           |             |         |
| Black                 | 1.95           | 0.482, 7.93 | 0.343   |                           |             |         |
| Mixed/Other           | 1.08           | 0.172, 7.24 | 0.931   |                           |             |         |
| IMD quintile          | 0.809          | 0.488, 1.32 | 0.399   | 0.727                     | 0.455, 1.13 | 0.163   |
| BMI                   | 0.956          | 0.833, 1.1  | 0.522   | 0.981                     | 0.865, 1.12 | 0.769   |
| Age (months)          | 1.01           | 0.995, 1.02 | 0.273   | 1.01                      | 0.994, 1.02 | 0.333   |
| Gender (male)         | 0.559          | 0.148, 1.88 | 0.363   | 0.552                     | 0.15, 1.81  | 0.342   |
| Likelihood Ratio Test |                |             | 0.7679  |                           |             |         |

---

 Invasive ventilation
 

---

|                       | Complete model |              |         | Model excluding ethnicity |              |         |
|-----------------------|----------------|--------------|---------|---------------------------|--------------|---------|
|                       | Estimate       | 95% CI       | p-value | Estimate                  | 95% CI       | p-value |
| Ethnicity (Black)     | 10.3           | 1.4, 224     | 0.0502  |                           |              |         |
| IMD quintile          | 0.61           | 0.223, 1.45  | 0.293   | 0.426                     | 0.174, 0.865 | 0.0339  |
| BMI                   | 0.833          | 0.661, 0.999 | 0.0753  | 0.873                     | 0.702, 1.04  | 0.169   |
| Age (months)          | 1.01           | 0.993, 1.03  | 0.303   | 1.01                      | 0.992, 1.02  | 0.418   |
| Gender (male)         | 1.04           | 0.198, 6.28  | 0.964   | 0.81                      | 0.165, 4.58  | 0.798   |
| Likelihood Ratio Test |                |              | 0.04722 |                           |              |         |

|                       | Complete model |             |                 | Model excluding ethnicity |              |                 |
|-----------------------|----------------|-------------|-----------------|---------------------------|--------------|-----------------|
|                       | Estimate       | 95% CI      | <i>p</i> -value | Estimate                  | 95% CI       | <i>p</i> -value |
| Asian                 | 2.27           | 0.303, 17.1 | 0.415           |                           |              |                 |
| Black                 | 2.98           | 0.741, 13.9 | 0.136           |                           |              |                 |
| Mixed/Other           | 4.71           | 0.683, 37.4 | 0.12            |                           |              |                 |
| IMD quintile          | 0.67           | 0.385, 1.11 | 0.134           | 0.602                     | 0.364, 0.941 | 0.034           |
| BMI                   | 0.973          | 0.853, 1.11 | 0.673           | 0.987                     | 0.873, 1.11  | 0.837           |
| Age (months)          | 1.01           | 0.995, 1.02 | 0.258           | 1.01                      | 0.995, 1.02  | 0.284           |
| Gender (male)         | 0.65           | 0.188, 2.14 | 0.483           | 0.718                     | 0.221, 2.26  | 0.573           |
| Likelihood Ratio Test |                |             | 0.3319          |                           |              |                 |

**Figure S.4 Classification of patients according to CDC vs WHO vs RCPCH diagnostic criteria**

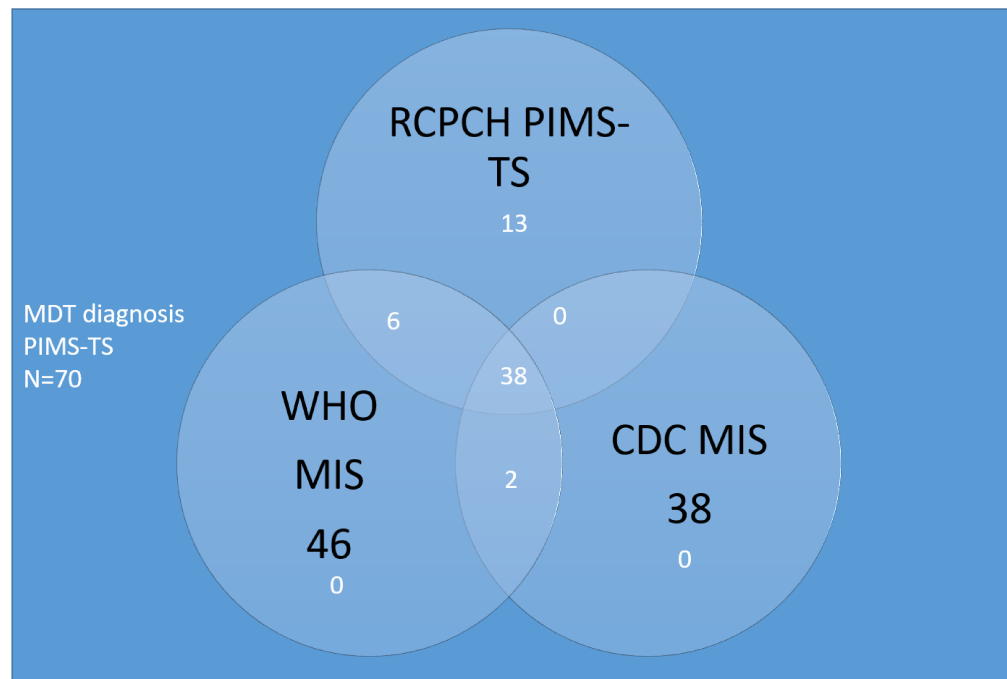

57 met the RCPCH case definition. 46 met WHO criteria, and 38 met CDC criteria (Figure 1). The RCPCH definition is the most sensitive including the highest number of our cohort.

### 5.5 Sensitivity analysis of crude Odds Ratios for PIMS-TS by IMD Quintile and Ethnicity, with and without those meeting RCPCH PIMS-TS classification

#### Using RCPCH Inclusion Criteria ( $n=51$ ; also excludes those over age 16 and from outside STRS region)

| IMD Quintile/Ethnicity | $n$ , Cohort | %, Cohort | $n$ , Population | %, Population | Rate per 100,000 | OR       |        |            | All Evelina PIMS-TS Cohort, excluding those over age 16 and from outside STRS region ( $n=63$ ) |        |            |      |         |
|------------------------|--------------|-----------|------------------|---------------|------------------|----------|--------|------------|-------------------------------------------------------------------------------------------------|--------|------------|------|---------|
|                        |              |           |                  |               |                  | Estimate | 95% CI | $p$ -value | OR Estimate                                                                                     | 95% CI | $p$ -value |      |         |
| 1 (most deprived)      | 13           | 25%       | 185365           | 14%           | 7.0              | 4.5      | 1.6    | 12.6       | 0.004                                                                                           | 5.2    | 1.9        | 14.3 | 0.001   |
| 2                      | 16           | 31%       | 300958           | 22%           | 5.3              | 3.4      | 1.3    | 9.3        | 0.017                                                                                           | 4.7    | 1.8        | 12.4 | 0.002   |
| 3                      | 11           | 22%       | 276896           | 20%           | 4.0              | 2.5      | 0.9    | 7.3        | 0.083                                                                                           | 3.5    | 1.3        | 9.6  | 0.016   |
| 4                      | 6            | 12%       | 277762           | 20%           | 2.2              | 1.4      | 0.4    | 4.5        | 0.589                                                                                           | 1.4    | 0.4        | 4.5  | 0.589   |
| 5 (least deprived)     | 5            | 10%       | 320936           | 24%           | 1.6              | 1        |        |            |                                                                                                 | 1      |            |      |         |
| White                  | 13           | 25%       | 942267           | 73%           | 1.4              | 1        |        |            |                                                                                                 | 1      |            |      |         |
| Black                  | 27           | 53%       | 140045           | 11%           | 19.3             | 14.0     | 7.2    | 27.1       | <0.0001                                                                                         | 15.7   | 8.6        | 28.7 | <0.0001 |
| Asian                  | 6            | 12%       | 94094            | 7%            | 6.4              | 4.6      | 1.8    | 12.2       | 0.002                                                                                           | 4      | 1.6        | 10.3 | 0.004   |
| Mixed                  | 3            | 6%        | 100718           | 8%            | 3.0              | 2.2      | 0.6    | 7.6        | 0.230                                                                                           | 2.5    | 0.8        | 7.5  | 0.104   |
| Other                  | 2            | 4%        | 16851            | 1%            | 11.9             | 8.6      | 1.9    | 38.1       | 0.005                                                                                           | 11.2   | 3.2        | 38.6 | 0.000   |

#### Treatment of IMD Quintile variable

Regression models were fit in two ways: treating the IMD quintile independent variable as a linear, numeric covariate, and treating IMD quintile as an ordinal variable. It is theoretically preferable to treat IMD as an ordinal variable, however the sample size meant this did not always give meaningful results, as described below.

#### Length of Stay

For the length of stay outcome, we report in Table 5 the results where IMD was treated as a linear, numeric covariate. The supplementary table below shows the results when IMD was treated as an ordered categorical variable, which are comparable.

Ventilation

For the invasive ventilation outcome, we report in Table 6 the results where IMD was treated as a linear, numeric covariate. When IMD quintile was treated as an ordinal variable, the confidence intervals on the estimates for the IMD terms were so wide as to render the estimates meaningless. This led us to fit a model excluding the IMD quintile variable, and we present this in the supplementary version of Table 6 below.

The model excluding IMD shows a larger estimate for Black ethnicity; this is attenuated when IMD is included in the model. A likelihood ratio test comparing these two models does not show a significant improvement on inclusion of IMD ( $p=0.298$ ). Still, the small sample size and the distribution of the outcome (9/10 ventilated patients were in the Black ethnicity group), severely limit conclusions and inferences from these analyses, which should be repeated on a larger multi-centre sample.

**Supplementary version of Table 5.** Estimated regression coefficients for length of stay (log transformed), with IMD treated as an ordered categorical variable

|                 | Complete model including ethnicity |                           |                 | Model excluding ethnicity |                           |                 |
|-----------------|------------------------------------|---------------------------|-----------------|---------------------------|---------------------------|-----------------|
|                 | Estimate                           | Confidence Interval (95%) | <i>p</i> -value | Estimate                  | Confidence Interval (95%) | <i>p</i> -value |
| Asian           | 0.964                              | 0.658, 1.41               | 0.85            |                           |                           |                 |
| Black           | 1.32                               | 0.993, 1.75               | 0.0557          |                           |                           |                 |
| Mixed           | 0.744                              | 0.465, 1.19               | 0.215           |                           |                           |                 |
| Other           | 1.56                               | 0.911, 2.68               | 0.103           |                           |                           |                 |
| IMD - Linear    | 0.788                              | 0.568, 1.09               | 0.149           | 0.672                     | 0.492, 0.917              | 0.0131          |
| IMD - Quadratic | 1.22                               | 0.923, 1.6                | 0.161           | 1.28                      | 0.962, 1.69               | 0.09            |
| IMD - Cubic     | 1.27                               | 0.973, 1.67               | 0.0771          | 1.37                      | 1.04, 1.78                | 0.0232          |
| IMD - ^4        | 1.16                               | 0.919, 1.45               | 0.211           | 1.16                      | 0.916, 1.46               | 0.216           |
| BMI             | 0.966                              | 0.942, 0.992              | 0.0109          | 0.975                     | 0.95, 1                   | 0.0547          |
| Age (months)    | 1                                  | 1, 1                      | 0.0324          | 1                         | 1, 1                      | 0.0405          |
| Gender (male)   | 1.02                               | 0.807, 1.29               | 0.855           | 1.01                      | 0.795, 1.29               | 0.912           |

Likelihood ratio test when including ethnicity vs not including ethnicity  $p=0.02641$  (58 vs 62 degrees of freedom).

|  | Complete model |  | Model excluding ethnicity | Model excluding IMD |
|--|----------------|--|---------------------------|---------------------|
|--|----------------|--|---------------------------|---------------------|

|                          | Estimate | 95% CI       | p-value |  | Estimate | 95% CI       | p-value |  | Estimate | 95% CI      | p-value | Supplementary version of Table 6. Estimated regression |
|--------------------------|----------|--------------|---------|--|----------|--------------|---------|--|----------|-------------|---------|--------------------------------------------------------|
| <b>Ethnicity (Black)</b> | 10.3     | 1.4, 224     | 0.0502  |  |          |              |         |  | 17.1     | 2.63, 345   | 0.0124  |                                                        |
| <b>IMD quintile</b>      | 0.61     | 0.223, 1.45  | 0.293   |  | 0.426    | 0.174, 0.865 | 0.0339  |  |          |             |         |                                                        |
| <b>BMI</b>               | 0.833    | 0.661, 0.999 | 0.0753  |  | 0.873    | 0.702, 1.04  | 0.169   |  | 0.828    | 0.66, 0.991 | 0.0622  |                                                        |
| <b>Age (months)</b>      | 1.01     | 0.993, 1.03  | 0.303   |  | 1.01     | 0.992, 1.02  | 0.418   |  | 1.01     | 0.993, 1.03 | 0.287   |                                                        |
| <b>Gender (male)</b>     | 1.04     | 0.198, 6.28  | 0.964   |  | 0.81     | 0.165, 4.58  | 0.798   |  | 1.03     | 0.205, 6.03 | 0.969   |                                                        |

coefficients for invasive ventilation, IMD treated as a linear variable (as in Table 6 in the main text), compared with a model excluding IMD

Likelihood ratio test comparing complete model with model excluding ethnicity  $p=0.04722$  (64 vs 65 degrees of freedom).

Likelihood ratio test comparing complete model with model excluding IMD  $p=0.298$  (64 vs 65 degrees of freedom).
